# Supplementary material
Source: publisher site journal article supplement (https://www.dovepress.com/article/445374)
Supplement: Supplementary file 1 [file get_supplementary_file.php]

**Table S1: Baseline characteristics comparison of participants included versus excluded**

|  | Participants included | Participants excluded | P-value |
| --- | --- | --- | --- |
| N | 116 | 82 |  |
| Age | 28.6 (4.6) | 28.5 (4.7) | 0.881 |
| BMI (kg/m2) | 27.3 (3.1) | 27.4 (3.2) | 0.826 |
| Gestational diabetes | 25 (21.6%) | 22 (26.8%) | 0.402 |
| Hypertension | 3 (2.6%) | 2 (2.4%) | 1.000 |
| Gravidity | 2 (1-7) | 2 (1-7) | 0.224 |
| Parity | 0 (0-2) | 0 (0-2) | 0.847 |
| Gestational age | 38 (34+1-41+3) | 38 (34-41+4) | 0.681 |
| Rupture-to-delivery interval (h) | 11.5 (1.5-68.0) | 11.0 (2.0-67.0) | 0.455 |
| Amniotic fluid volume (mL) | 525.0(220.0) | 520.0 (225.0) | 0.876 |
| Amniotic fluid characteristics |  |  | 0.599 |
| Clear | 102 (87.9%) | 70 (85.4%) |  |
| Grade I- II | 6 (5.2%) | 5 (6.1%) |  |
| Grade III | 8 (6.9%) | 7 (8.5%) |  |
| GBS | 16 (13.8%) | 12 (14.6%) | 1.000 |

The data are expressed as Mean (SD) and Median (Min-Max) / N (%).

For the following variables: body mass index (BMI), group B streptococcus (GBS). Between-group comparisons for continuous variables were conducted using independent samples t-tests or Mann-Whitney U tests, depending on the distribution characteristics of the data. Categorical variables were compared using Chi-square tests or Fisher’s exact tests, as appropriate.

**Table S2: Comparison of general information, laboratory indicators and delivery outcomes between training and validation sets in late preterm and term PROM**

|  | Training set | | Validation set | | P-value |
| --- | --- | --- | --- | --- | --- |
| N | 81 | | 35 | |  |
| Age | 28.2 (4.0) | | 29.7 (5.7) | | 0.112 |
| BMI (kg/m2) | 27.2 (3.0) | | 27.3 (3.3) | | 0.884 |
| Gestational diabetes | 18 (22.2%) | | 7 (20.0%) | | 0.789 |
| Hypertension | 2 (2.5%) | | 1 (2.9%) | | 1.000 |
| Gravidity | 2 (1-6) | | 2 (1-7) | | 0.588 |
| Parity | 0 (0-2) | | 0 (0-2) | | 0.494 |
| Gestational age | 38 (34+1-40+6) | | 38 (35-41+3) | | 0.362 |
| Rupture-to-delivery interval (h) | 11.5 (2.0-49.0) | | 11.0 (1.5-68.0) | | 0.521 |
| Amniotic fluid volume (mL) | 528.1(171.6) | | 517.7 (307.1) | | 0.816 |
| Amniotic fluid characteristics |  | |  | | 0.573 |
| Clear | 72 (88.9%) | | 30 (85.7%) | |  |
| Grade I- II | 5 (6.2%) | | 1 (2.9%) | |  |
| Grade III | 4 (4.9%) | | 4 (11.4%) | |  |
| GBS | 11 (13.6%) | | 5 (14.3%) | | 0.919 |
| **Laboratory indicators** |  | |  | |  |
| Prenatal WBC count (×109/L) | 10.79 (4.15) | | 9.46 (3.06) | | 0.092 |
| Prenatal neutrophil ratio (%) | 77.0 (6.4) | | 76.0 (7.6) | | 0.456 |
| Prenatal CRP (mg/L) | 4.5 (0.6-84.0) | | 4.2 (1.9-170.0) | | 0.335 |
| Prenatal PCT (ng/mL) | 0.041 (0.010-0.420) | | 0.043 (0.010-2.700) | | 0.950 |
| HGB (g/L) | 115.9 (10.4) | | 114.4 (9.4) | | 0.473 |
| PLT (×109/L) | 213.0 (50.0) | | 193.3 (51.2) | | 0.056 |
| GLU (mmol/L) | 4.8 (1.2) | | 4.8(1.0) | | 0.918 |
| TC (mmol/L) | 6.26 (1.08) | | 6.16 (0.97) | | 0.653 |
| TG (mmol/L) | 4.03 (1.36) | | 3.58 (1.08) | | 0.083 |
| HCA | 35 (43.2%) | | 16 (45.7%) | | 0.803 |
| **Delivery outcomes** |  | |  | |  |
| Delivery mode | |  | |  | 0.526 |
| Vaginal delivery | | 58(71.6%) | | 23 (65.7%) |  |
| Cesarean delivery | | 23 (28.4%) | | 12 (34.3%) |  |
| Fetal weight (g) | 3225 (412) | | 3209 (372) | | 0.845 |
| Fetal gender (male) | 42 (51.9%) | | 20 (57.1%) | | 0.600 |
| Apgar score at 1 min | 8.8 (0.5) | | 8.9 (0.3) | | 0.462 |
| Apgar score at 5 min | 9.0 (0.2) | | 9.0 (0.2) | | 0.854 |
| Neonatal WBC count (×109/L) | 13.32 (4.59) | | 11.24 (3.08) | | 0.016 |
| Neonatal neutrophil ratio (%) | 60.4(8.8) | | 58.5 (7.1) | | 0.253 |
| Neonatal CRP (mg/L) | 4.1 (0.5-9.0) | | 4.1 (2.4-5.3) | | 0.362 |

The data are expressed as Mean (SD) and Median (Min-Max) / N (%).

For the following variables: body mass index (BMI), group B streptococcus (GBS), white blood cell count (WBC), C-reactive protein (CRP), procalcitonin (PCT), hemoglobin (HGB), platelets (PLT), glucose (GLU), cholesterol (TC), and triglycerides (TG). Between-group comparisons for continuous variables were conducted using independent samples t-tests or Mann-Whitney U tests, depending on the distribution characteristics of the data. Categorical variables were compared using Chi-square tests or Fisher’s exact tests, as appropriate.

**Table S3: The delivery outcomes between training and validation sets of PROM pregnant women with or without HCA in late preterm and term**

|  | Training set |  |  | Validation set |  |  |
| --- | --- | --- | --- | --- | --- | --- |
|  | Non-HCA (n=46) | HCA (n=35) | P-value | Non-HCA (n=19) | HCA (n=16) | P-value |
| Delivery mode |  |  | 0.003 |  |  | 0.279 |
| Vaginal delivery | 39 (84.8%) | 19 (54.3%) |  | 14 (73.7%) | 9 (56.3%) |  |
| Cesarean delivery | 7 (15.2%) | 16 (45.7%) |  | 5 (26.3%) | 7 (43.8%) |  |
| Fetal weight (g) | 3270 (463) | 3165 (332) | 0.257 | 3207 (378) | 3211 (377) | 0.973 |
| Fetal gender (male) | 23 (50.0%) | 19(54.3%) | 0.702 | 10 (52.6%) | 10 (62.5%) | 0.557 |
| Apgar score at 1 min | 8.8 (0.5) | 8.8 (0.6) | 0.827 | 8.9 (0.3) | 8.9 (0.3) | 0.860 |
| Apgar score at 5 min | 9.0 (0.1) | 9.1 (0.3) | 0.527 | 9.0 (0.0) | 9.1 (0.2) | 0.282 |
| Neonatal WBC count (×109/L) | 12.30 (4.04) | 14.67 (4.97) | 0.020 | 10.62 (2.41) | 11.98 (3.66) | 0.199 |
| Neonatal neutrophil ratio (%) | 57.7 (9.0) | 64.0 (7.2) | 0.001 | 57.8 (6.6) | 59.3 (7.7) | 0.552 |
| Neonatal CRP (mg/L) | 4.1 (0.5-9.0) | 4.6 (0.5-8.1) | 0.048 | 4.0 (2.4-5.3) | 4.3 (3.1-4.9) | 0.111 |

The data are expressed as Mean (SD) and Median (Min-Max) / N (%).

For the following variables: histologic chorioamnionitis (HCA), white blood cell count (WBC), C-reactive protein (CRP). Between-group comparisons for continuous variables were conducted using independent samples t-tests or Mann-Whitney U tests, depending on the distribution characteristics of the data. Categorical variables were compared using Chi-square tests or Fisher’s exact tests, as appropriate.

**Table S4: Post-hoc power analysis results for the multivariable logistic regression model using computer simulation for efficacy assessment**

|  |  |  | Power value | | | |
| --- | --- | --- | --- | --- | --- | --- |
|  | Mean ± SD | OR | N=80 | N=100 | N=120 | N=140 |
| BMI | 27.2 ± 3.0 | 0.768 | 0.891 | 0.948 | 0.979 | 0.997 |
| gravidity | 2.0 ± 1.2 | 0.360 | 0.994 | 1.000 | 1.000 | 1.000 |
| amniotic fluid characteristics | 0.160 ± 0.486 | 9.850 | 0.992 | 0.998 | 1.000 | 1.000 |
| prenatal WBC | 10.79 ± 4.15 | 1.420 | 0.999 | 1.000 | 1.000 | 1.000 |

Prevalence of outcome among general population: 0.432

BMI: body mass index; WBC: white blood cell count; SD: standard deviation; OR: odds ratio;
